# Supplementary material for: The Effects of Volatile Organic Compounds (VOCs) on the Formation of Heterocyclic Amines (HAs) in Meat Patties, under Different Smoking Temperatures and Durations
Source: MDPI journal article supplement (doi:10.3390/foods11223687), 2022-11-17
Supplement: s1 [file s1]

## Supporting Information

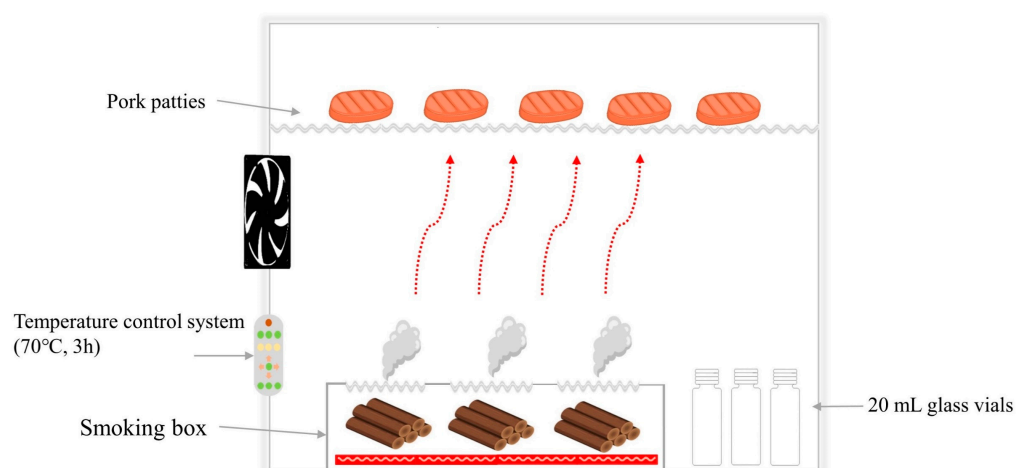

Figure S1. Schematic diagram of smoke experiment device.

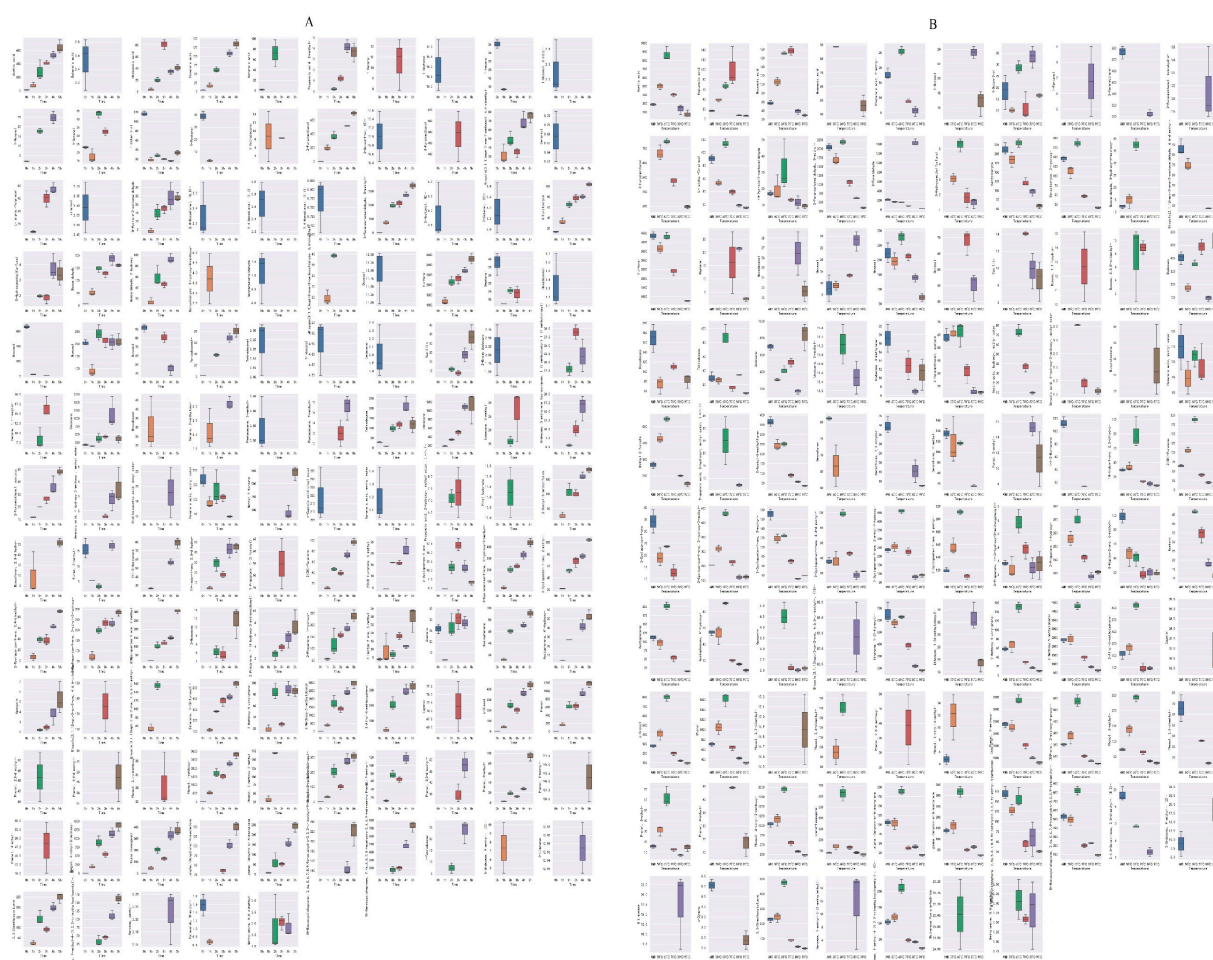

Figure S1. VOCs content ( $\text{ng}\cdot\text{g}^{-1}$ ) of smoked meat patties at different durations (A) and temperatures (B).

Table S1. Mass spectrometric parameters of HAs in MRM mode of UPLC-MS/MS.

|    | compound           | channel reaction | dwell time (s) | cone voltage (V) | collision energy (eV) | delay time (s) |
|----|--------------------|------------------|----------------|------------------|-----------------------|----------------|
| 1  | AαC                | 183.00 > 140.00  | 0.15           | 30               | 30                    | 0.1            |
| 2  | IQ                 | 199.00 > 130.00  | 0.15           | 30               | 40                    | 0.02           |
| 3  | MeIQx              | 214.00 > 131.00  | 0.15           | 30               | 40                    | 0.02           |
| 4  | PhIP               | 225.00 > 210.00  | 0.15           | 30               | 30                    | 0.02           |
| 5  | 7,8-DiMeIQx        | 228.00 > 213.00  | 0.15           | 30               | 25                    | 0.02           |
| 6  | DMIP               | 163.00 > 148.00  | 0.15           | 30               | 25                    | 0.1            |
| 7  | Norharman          | 169.00 > 115.00  | 0.15           | 30               | 30                    | 0.02           |
| 8  | Phe-P-1            | 171.00 > 127.00  | 0.15           | 30               | 30                    | 0.02           |
| 9  | 1,5,6-TMIP         | 177.00 > 162.00  | 0.15           | 30               | 25                    | 0.02           |
| 10 | Harman             | 183.00 > 115.00  | 0.15           | 30               | 30                    | 0.02           |
| 11 | MeAαC              | 198.00 > 181.00  | 0.15           | 30               | 25                    | 0.02           |
| 12 | Glu-P-1            | 199.00 > 145.00  | 0.15           | 30               | 30                    | 0.02           |
| 13 | IQx                | 200.00 > 185.00  | 0.15           | 30               | 25                    | 0.02           |
| 14 | IQ[4,5- <i>b</i> ] | 199.00 > 115.00  | 0.15           | 30               | 40                    | 0.1            |
| 15 | MeIQ               | 213.00 > 198.00  | 0.15           | 30               | 25                    | 0.02           |
| 16 | 4,8-DiMeIQx        | 228.00 > 212.00  | 0.15           | 30               | 30                    | 0.02           |
| 17 | 4,7,8-TriMeIQx     | 242.00 > 227.00  | 0.15           | 30               | 30                    | 0.02           |
